# Supplementary material for: Sun Exposure and Melanoma Survival: A GEM Study
Source: Oxford University Press journal article supplement (doi:10.1158/1055-9965.epi-14-0431), 2014-07-29
Supplement: 10559965epi140431-sup-130377_1_supp_2529205_n7j1vn.docx [file 10559965epi140431-sup-130377_1_supp_2529205_n7j1vn.docx]

| Table S2. Early life sun exposure and its association l with melanoma | | | | |
| --- | --- | --- | --- | --- |
| survival adjusted for Breslow thickness. | | |  |  |
|  |  | **Number in Study** | **Number Dead from Melanoma** | **Fully Adjusted Model** |
| **Variable** | **Level** | **HR (95% CI)+** |
| Sunburns - Early life | 0 | 1584 | 114 | 1.00 |
|  | 1+ | 1496 | 104 | 1.07 (0.81, 1.41) |
|  | Missing | 498 | 37 |  |
| *P*-value |  |  |  | 0.66 |
| Holiday Sun Hours -Early life | 0 | 2729 | 197 | 1.00 |
|  | 1+ | 717 | 52 | 1.17 (0.84, 1.63) |
|  | Missing | 77 | 6 |  |
| *P -*value |  |  |  | 0.37 |
| Water related activities – early life | 0-<386 | 849 | 57 | 1.00 |
|  | 386-<1404 | 848 | 57 | 1.08 (0.73, 1.58) |
|  | 1404-<3414 | 852 | 57 | 0.92 (0.62, 1.37) |
|  | 3414+ | 850 | 71 | 1.27 (0.87, 1.85) |
|  | Missing | 179 | 13 |  |
| *P* for trend |  |  |  | 0.33 |
| UVB dose - early life kJ/m2 | 0-<3333 | 839 | 47 | 1.00 |
| 3333-<4916.5 | 838 | 43 | 0.97 (0.63, 1.48) |
|  | 4916.5-<6796 | 838 | 69 | 1.26 (0.83, 1.92) |
|  | 6796+ | 839 | 77 | 1.56 (1.01, 2.41) |
|  | Missing | 224 | 19 |  |
| *P* for trend |  |  |  | 0.03 |
| **Adjusted for center, primary status, crossover time-dependent status, | | | | |
| age at diagnosis and sex. | |  |  |  |
| +Adjusted for center, primary status, crossover time-dependent status, | | | | |
| age at diagnosis, sex, education and Breslow thickness (natural | | | | |
| log of continuous variable). | |  |  |  |
