# Supplementary material for: Sun Exposure and Melanoma Survival: A GEM Study
Source: Oxford University Press journal article supplement (doi:10.1158/1055-9965.epi-14-0431), 2014-07-29
Supplement: 10559965epi140431-sup-130377_1_supp_2529207_n7j1fn.docx [file 10559965epi140431-sup-130377_1_supp_2529207_n7j1fn.docx]

| Table S4. Recent sun exposure and its association with overall survival. | | | | | | | |  | |
| --- | --- | --- | --- | --- | --- | --- | --- | --- | --- |
| **Variable** | **Level** | **Number in Study** | | **Number Died** | | **Baseline ModelHR (95% CI)**** | | **Fully Adjusted Model HR (95%CI)+** | |
| Sunburns -recent | 0 | 3246 | | 533 | | 1.00 | | 1.00 | |
|  | 1+ | 252 | | 11 | | 0.73 (0.40, 1.37) | | 0.67 (0.35, 1.27) | |
|  | Missing | 80 | | 19 | |  | |  | |
| *P-*value |  |  | |  | | 0.30 | | 0.22 | |
| Holiday Sun Hours -Recent | 0 | 1852 | | 341 | | 1.00 | | 1.00 | |
|  | >0<56.5 | 740 | | 68 | | 0.66 (0.51, 0.86) | | 0.67 (0.51, 0.88) | |
|  | 56.5+ | 739 | | 106 | | 0.81 (0.64, 1.01) | | 0.82 (0.65, 1.03) | |
|  | Missing | 247 | | 48 | |  | |  | |
| *P -*value |  |  | |  | | 0.02 | | 0.03 | |
| Water related activities – Recent | 0<1314 | 848 | | 132 | | 1.00 | | 1.00 | |
|  | 1314<3120 | 830 | | 129 | | 0.92 (0.72, 1.18) | | 0.93 (0.73, 1.19) | |
|  | 3120<6140 | 868 | | 142 | | 0.84 (0.66, 1.08) | | 0.84 (0.65, 1.07) | |
|  | 6140+ | 849 | | 136 | | 0.77 (0.60, 0.98) | | 0.75 (0.58, 0.96) | |
|  | Missing | 183 | | 24 | |  | |  | |
| *P* for trend |  |  | |  | | 0.03 | | 0.01 | |
| UVB dose -recent kJ/m2 | 0>2,134 | 836 | | 113 | | 1.00 | | 1.00 | |
| 2,134>3,757 | 838 | | 112 | | 0.78 (0.59, 1.01) | | 0.77 (0.59, 1.00) | |
|  | 3,757>6,413 | 837 | | 142 | | 0.83 (0.64, 1.07) | | 0.80 (0.62, 1.03) | |
|  | 6,413+ | 837 | | 158 | | 0.69 (0.53, 0.90) | | 0.65 (0.50, 0.85) | |
|  | Missing | 230 | | 38 | |  | |  | |
| *P* for trend |  |  | |  | | 0.02 | | 0.004 | |
| Season of Diagnosis |  |  | |  | |  | |  | |
|  | Winter | 741 | | 126 | | 1.00 | | 1.00 | |
|  | Fall | 962 | | 163 | | 0.82 (0.65, 1.04) | | 0.81 (0.64, 1.03) | |
|  | Spring | 803 | | 117 | | 0.89 (0.69, 1.15) | | 0.91 (0.70, 1.18) | |
|  | Summer | 1060 | | 156 | | 0.88 (0.69, 1.11) | | 0.87 (0.69, 1.11) | |
| *P* for trend |  |  | |  | | 0.49 | | 0.51 | |
| *Adjusted for center, primary status, crossover time-dependent status, age at diagnosis and sex. | | | | | | | | | |
| **Adjusted for center, primary status, crossover time-dependent status, age at diagnosis, sex | | | | | | | | | |
| anatomic site and education. | | |  | |  | |  | |  |
